# Supplementary material
Source: Springer Nature journal article supplement (https://www.springerprofessional.de/resource/supplementary/13688_2012_2_MOESM7_ESM.pdf/11893952)

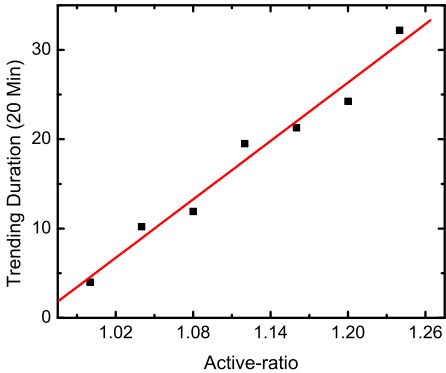

Supplement: MOESM7 [file 11893952]
